# Supplementary material for: Risk factors associated with fatality of severe fever with thrombocytopenia syndrome: a meta-analysis
Source: PubMed Central journal article supplement (PMC5687674; doi:10.18632/oncotarget.19163), 2017-07-11
Supplement: oncotarget-08-89119-s001.pdf [file oncotarget-08-89119-s001.pdf]

# Risk factors associated with fatality of severe fever with thrombocytopenia syndrome: a meta-analysis

## SUPPLEMENTARY MATERIALS

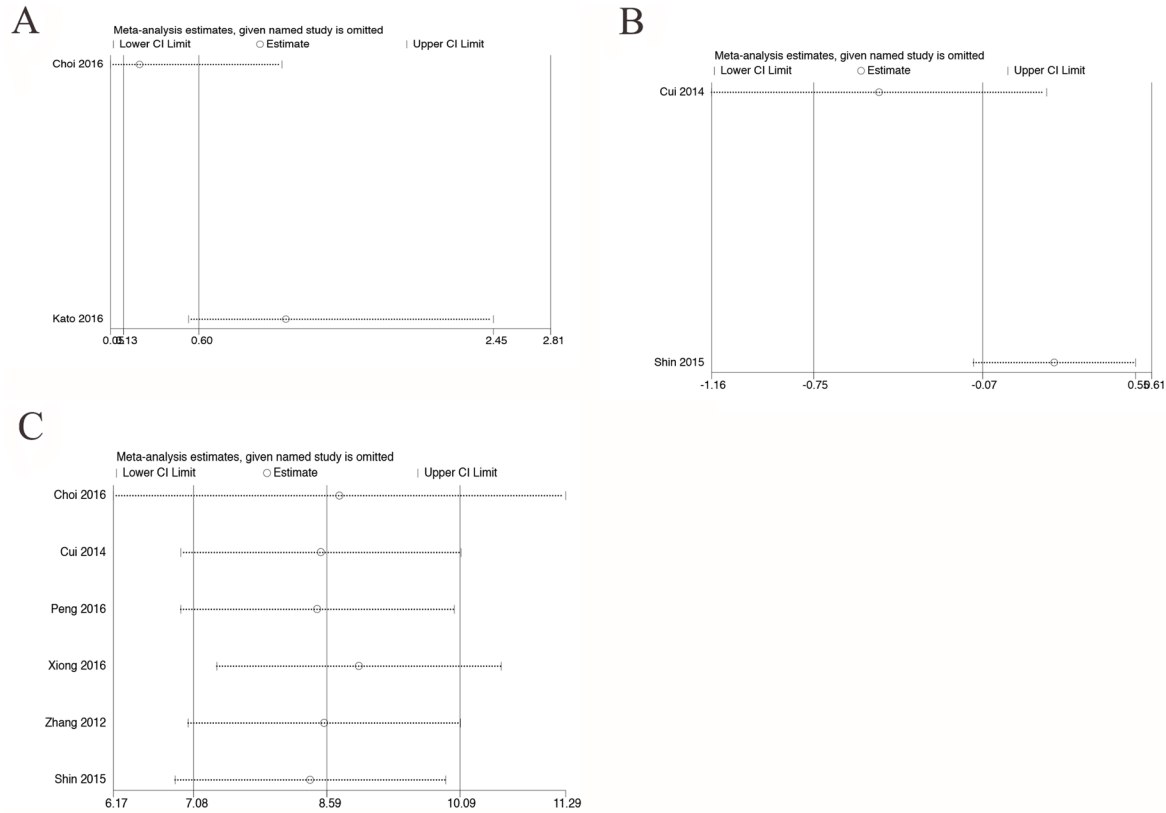

**Supplementary Figure 1:** Sensitivity analysis of the association between (A) tick bite, (B) interval days between illness onset to hospitalization, (C) age and fatality of SFTS disease.

**A**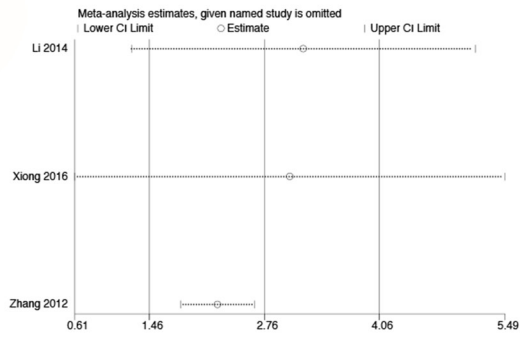**B**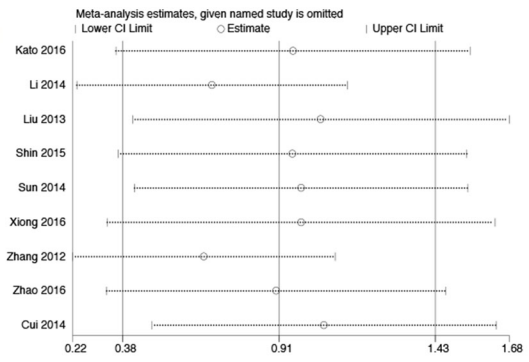**C**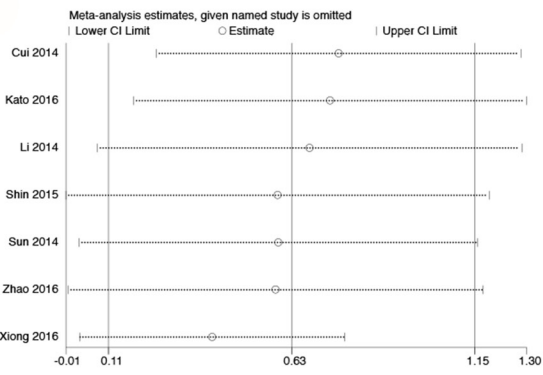**D**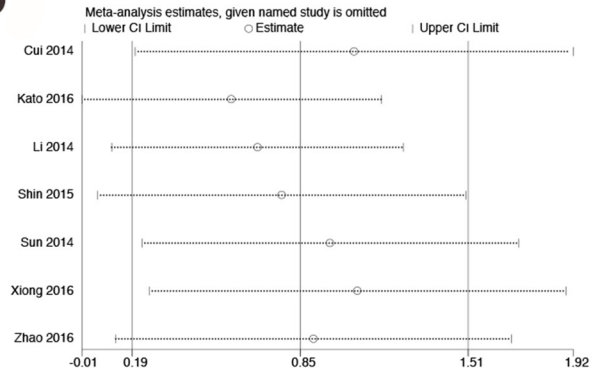**E**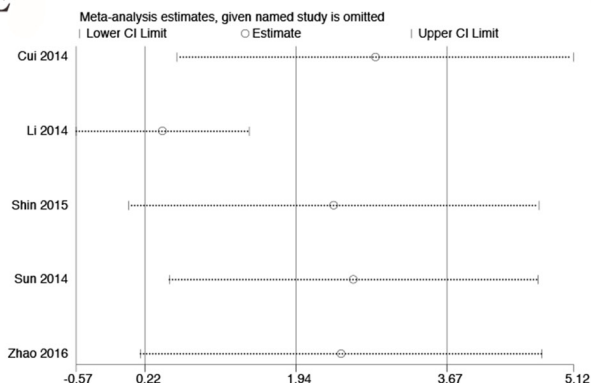**F**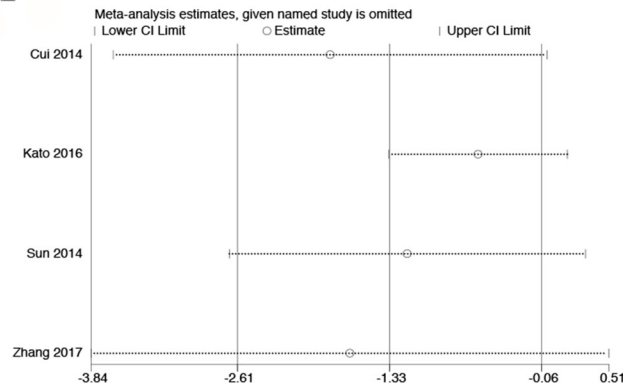

**Supplementary Figure 2:** Sensitivity analysis of the association between (A) viral loads, (B) AST, (C) ALT, (D) LDH, (E) CK as well as (F) ALB and fatality of SFTS disease.

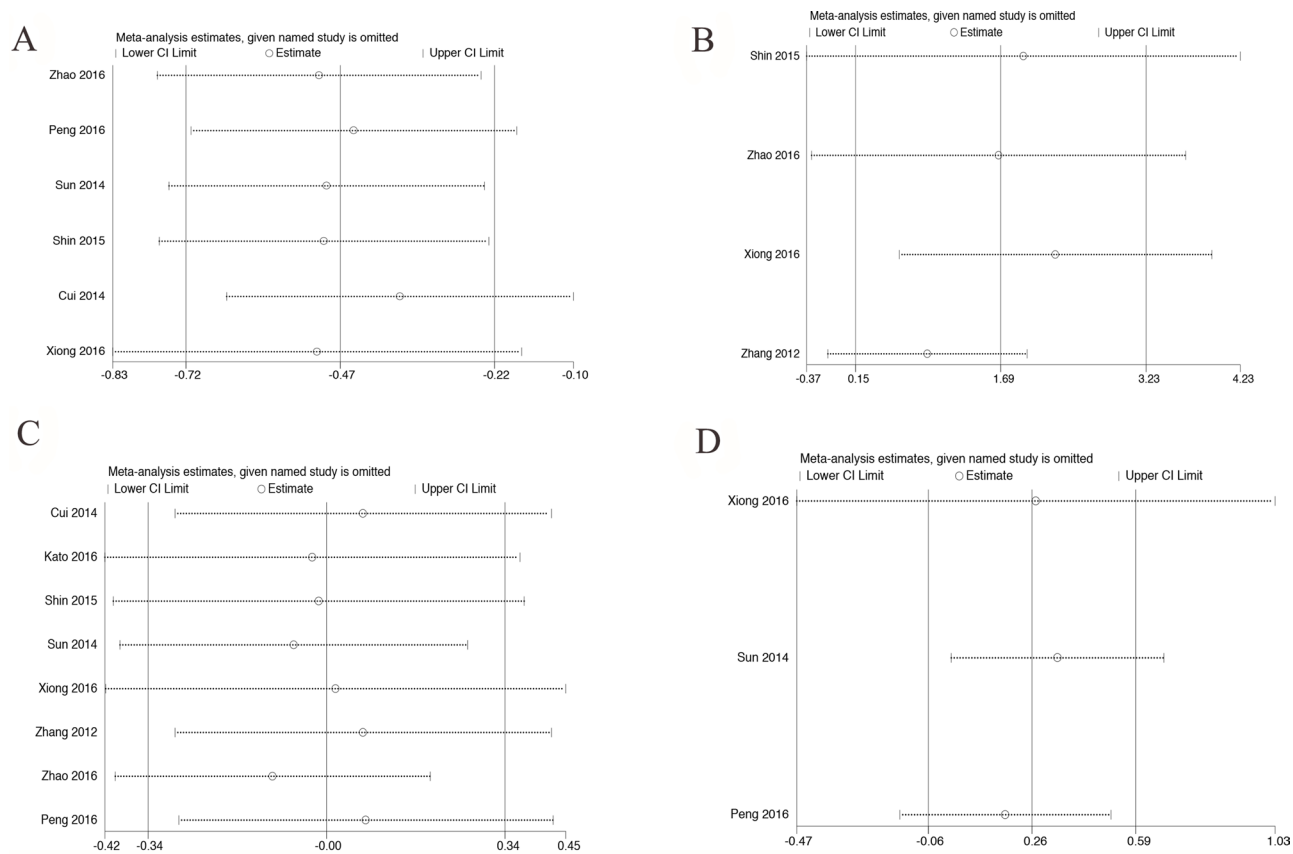

**Supplementary Figure 3:** Sensitivity analysis of the association between (A) PLT, (B) APTT, (C) lymphocytes, (D) neutrophils and fatality of SFTS disease.

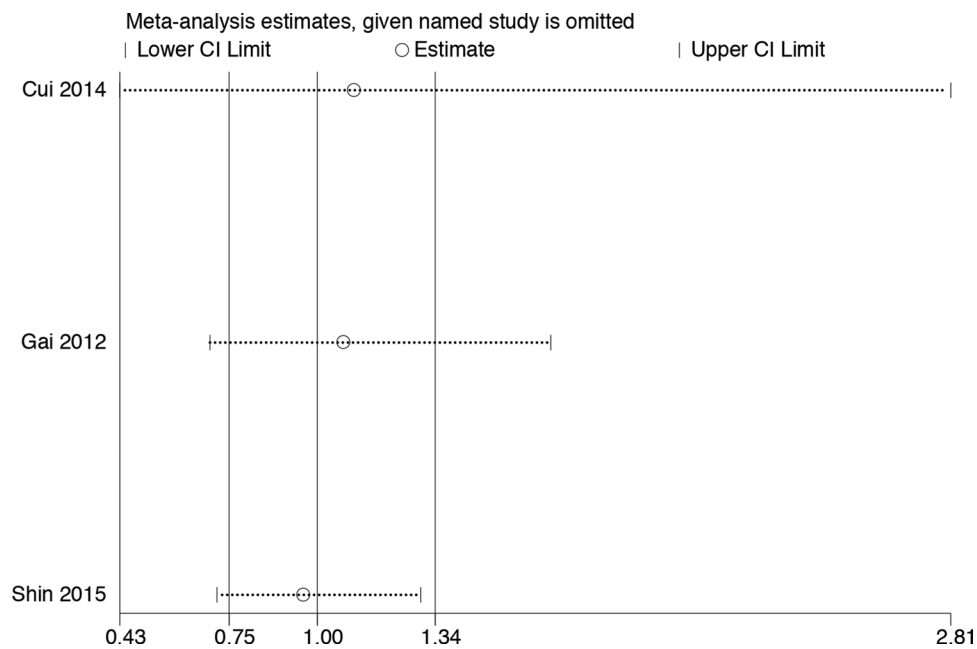

**Supplementary Figure 4:** Sensitivity analysis of the association between administration of ribavirin and survival of SFTS disease.
